# Supplementary material for: A cross-linkable triphenylamine derivative as a hole injection/transporting material in organic light-emitting diodes
Source: Royal Society of Chemistry journal article supplement (doi:10.1039/c5py00882d), 2015-01-01
Supplement: c5py00882d1.pdf [file c5py00882d1.pdf]

## Supplementary Information

### A Cross-Linkable Triphenylamine Derivative as a Hole Injection/Transporting Material in Organic Light-Emitting Diodes

Hsi-Kang Shih<sup>a</sup>, Yu-Lin Chu<sup>a</sup>, Feng-Chih Chang<sup>a,b</sup>, Chao-Yuan Zhu<sup>a</sup>, and Shiao-Wei Kuo<sup>b,\*</sup>

<sup>a</sup> Institute of Applied Chemistry, National Chiao Tung University, HsinChu, 300 Taiwan

<sup>b</sup> Department of Materials and Optoelectronic Science, National SunYat-Sen University, Kaohsiung, 804 Taiwan

E-mail: [kuosw@faculty.nsysu.edu.tw](mailto:kuosw@faculty.nsysu.edu.tw) (S.-W.K.); Tel.: +886-7525-4099 (S.-W.K.).

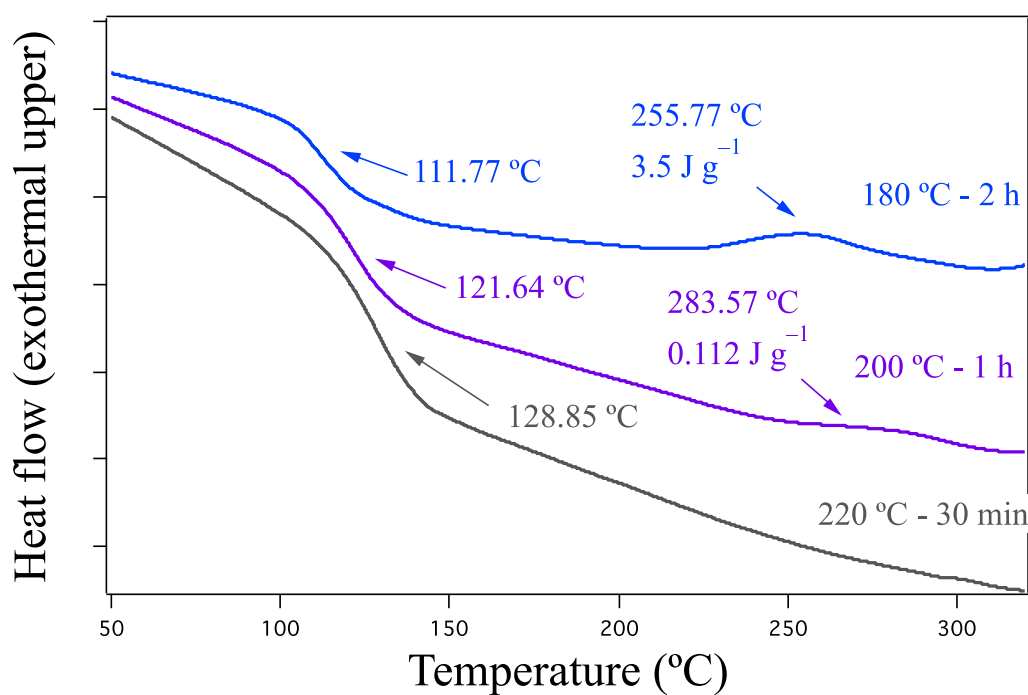

**Fig. S1** DSC thermograms of TPABZ, recorded after each heating stage

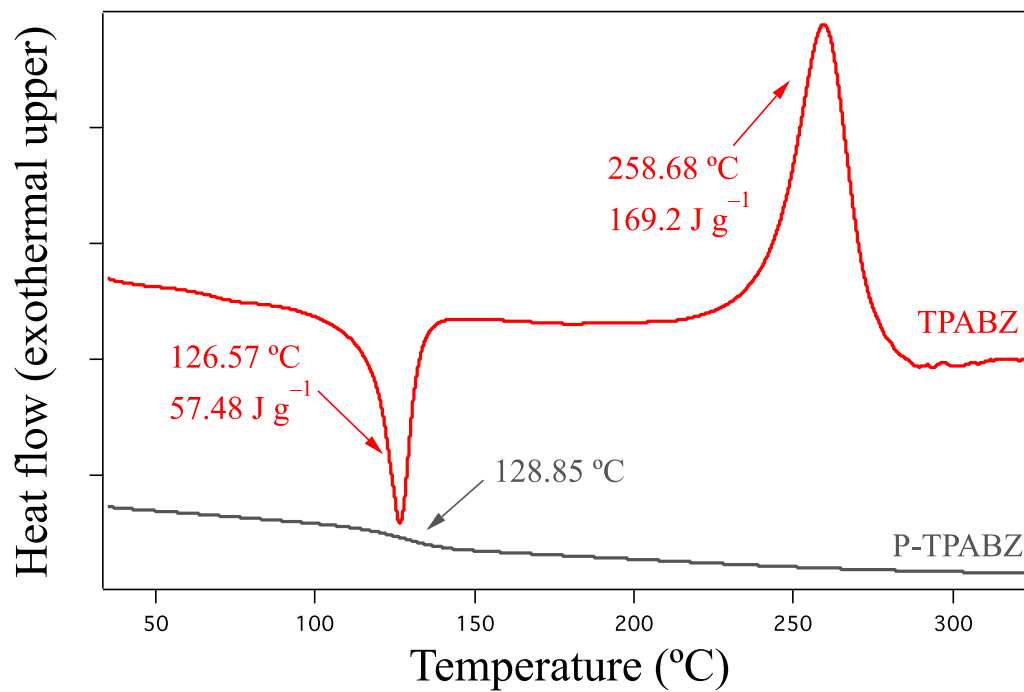

**Fig. S2** DSC thermograms of TPABZ and P-TPABZ

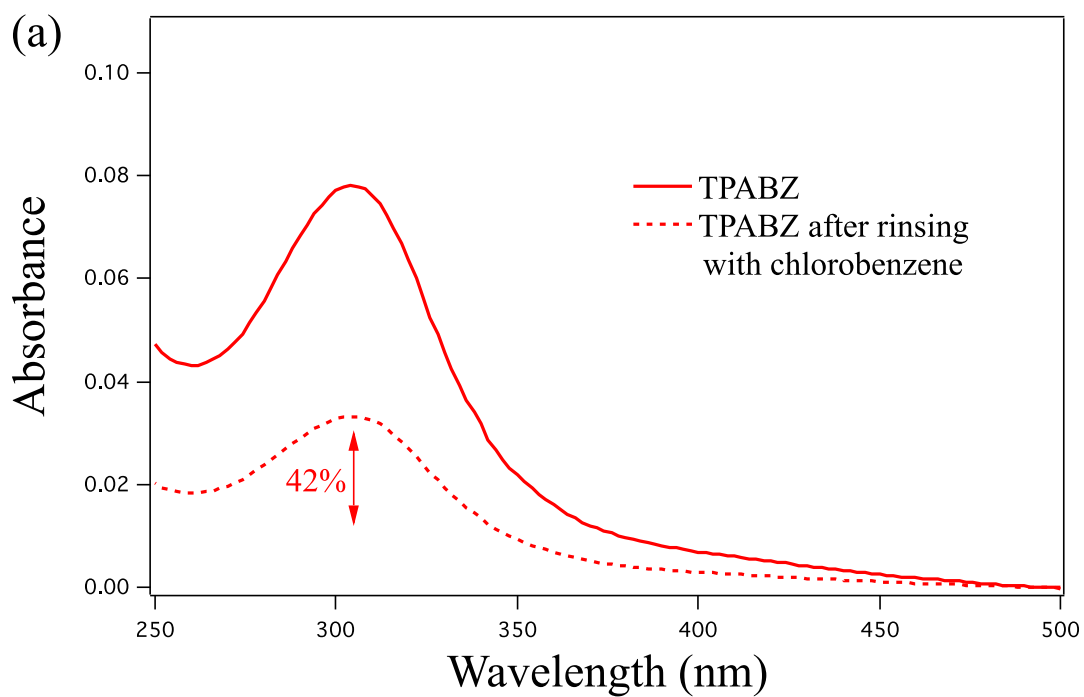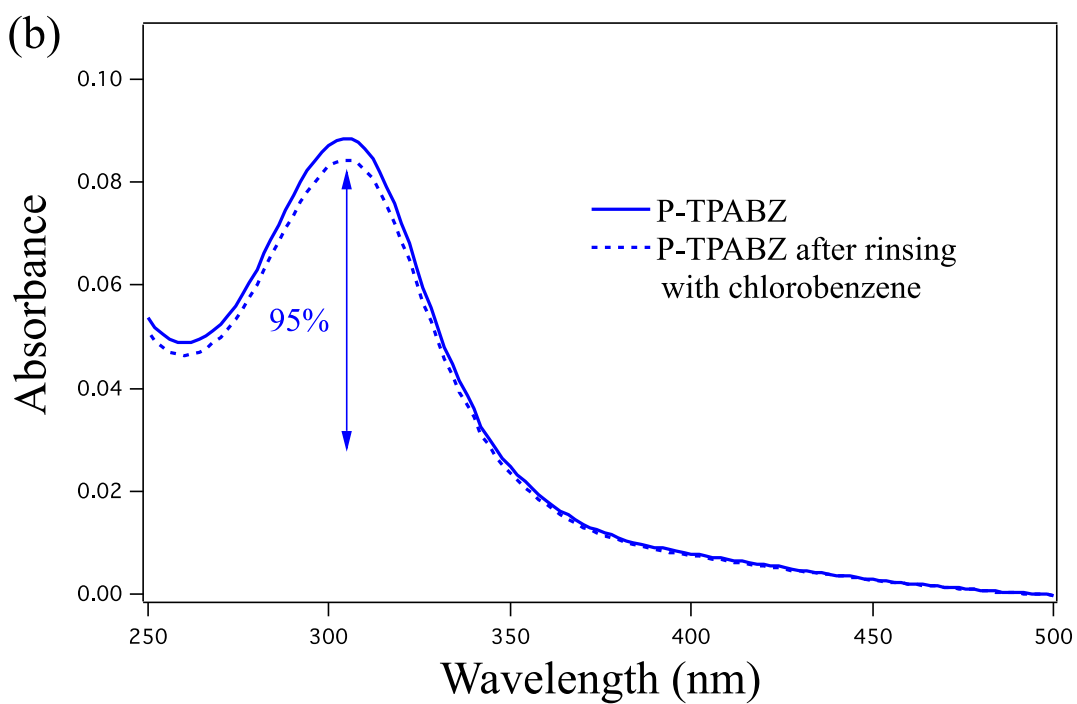

**Fig. S3** UV-Vis spectra of films of (a) TPABZ and (b) P-TPABZ, and after rinsing with chlorobenzene

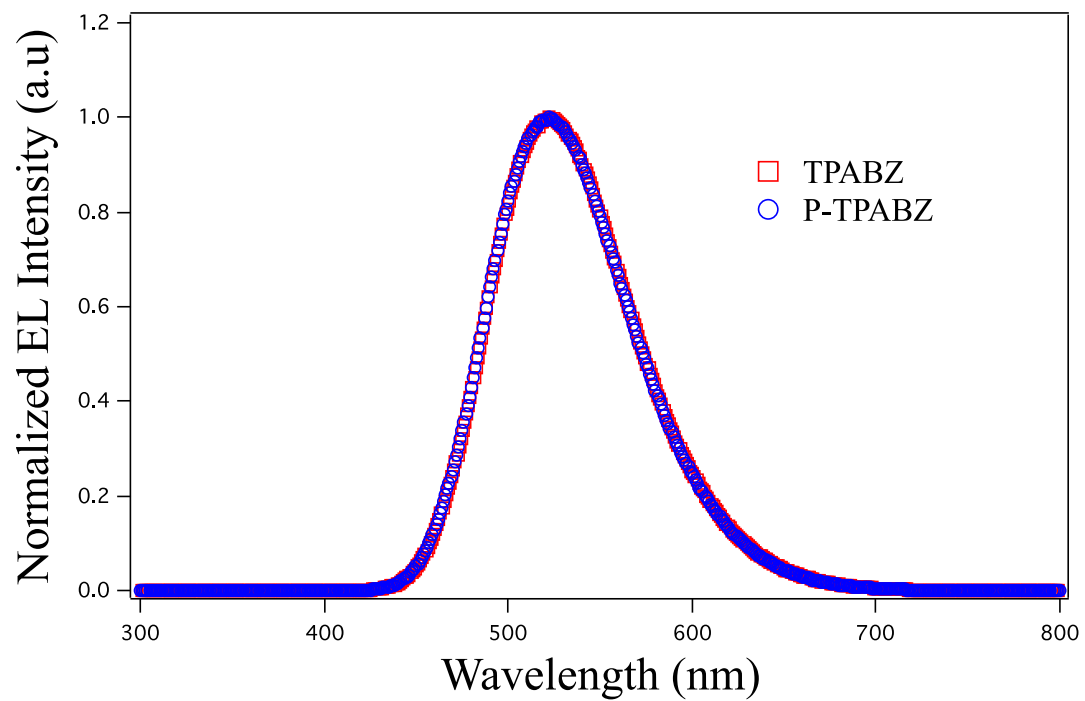

**Fig. S4** Electroluminescence based on the devices: ITO/TPABZ or P-TPABZ/NPB/Alq<sub>3</sub>/LiF/Al

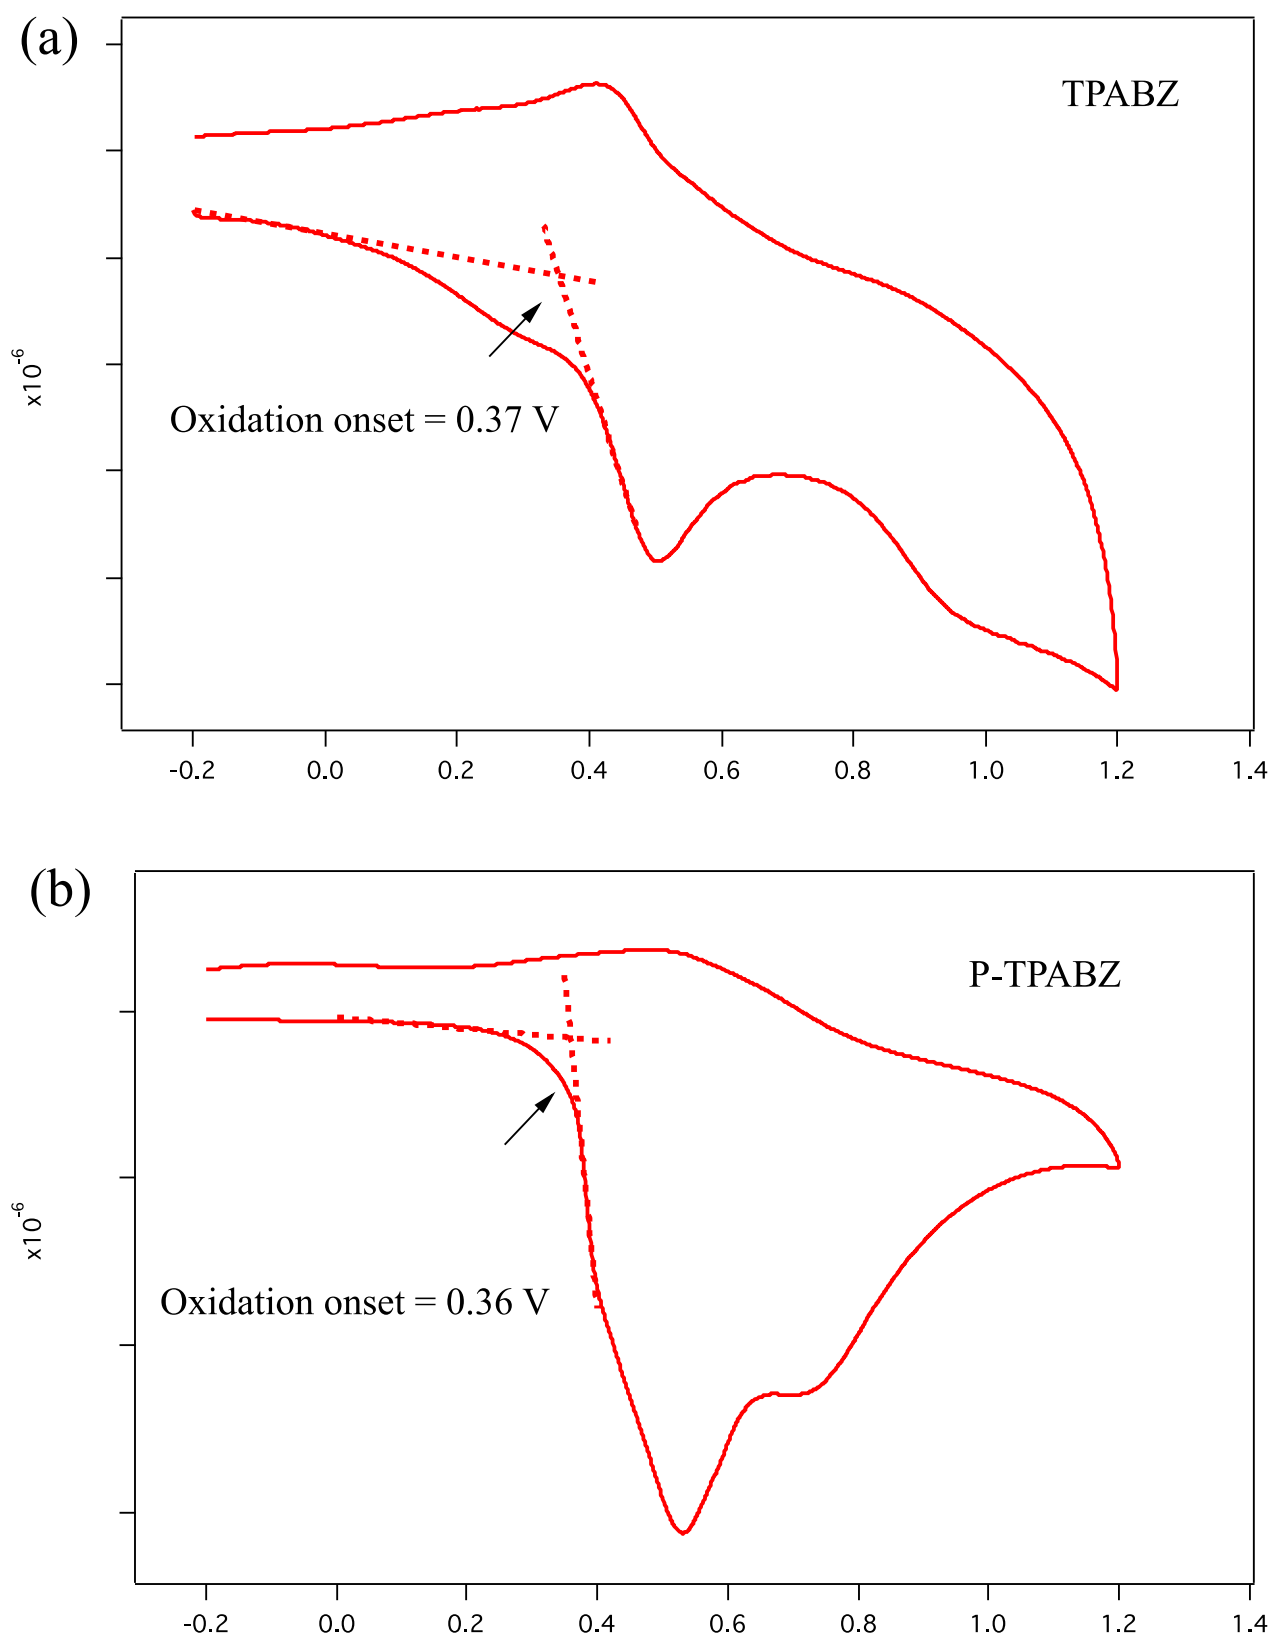

**Fig. S5** Cyclic voltammograms of films of (a) TPABZ and (b) P-TPABZ

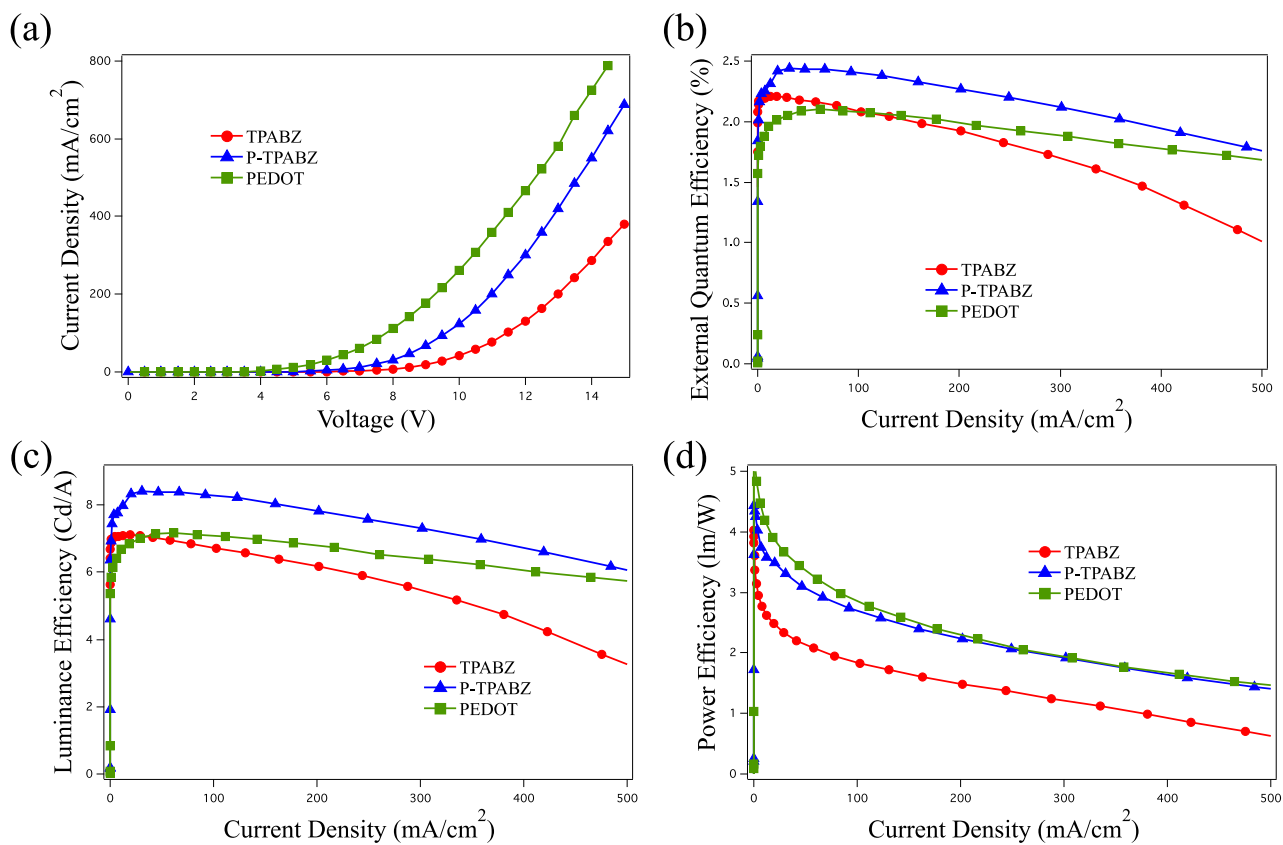

**Fig. S6** Characteristics of devices having the structure ITO/TPABZ or P-TPABZ or PEDOT:PSS/NPB/Alq<sub>3</sub>/LiF/Al: (a) current density–voltage; (b) EQE–current density; (c) LE–current density; (d) PE–current density
